# Supplementary material for: Effects of Starvation on the Physiology and Liver Transcriptome of Yellowcheek (Elopichthys bambusa)
Source: MDPI journal article supplement (doi:10.3390/fishes8040175), 2023-03-24
Supplement: s1 [file s1]

# Effects of Starvation on the Physiology and Liver Transcriptome of Yellowcheek (*Elopichthys bambusa*)

Min Xie <sup>1</sup>, Shaoming Li <sup>1</sup>, Zhifeng Feng <sup>1</sup>, Jin Xiang <sup>1,2</sup>, Qi Deng <sup>1</sup>, Pengpeng Wang <sup>1</sup>, Hao Wu <sup>1</sup>, Jingwei Gao <sup>1</sup>, Guoqing Zeng <sup>1,\*</sup> and Guangqing Xiang <sup>3</sup>

<sup>1</sup> Hunan Fisheries Science Institute, Changsha 410153, China

<sup>2</sup> Hunan Aquatic Foundation Seed Farm, Changsha 410153, China

<sup>3</sup> Longshan County Animal Husbandry and Aquatic Affairs Center, Xiangxi 416800, China

\* Correspondence: zengguoqing001@163.com or zengguoqing@163.com

**Table S1.** Basic information of sequencing data. F8C, un-starved yellowcheek samples collected on the eighth day after starvation experiment; F28C, un-starved yellowcheek samples collected on the 28th day after starvation experiment; F8, starved yellowcheek samples collected on the eighth day after starvation experiment; F28, starved yellowcheek samples collected on the 28th day after starvation experiment.

| Sample | RawReads | RawBases | CleanReads | CleanBases | ValidBases | Q30    | GC     |
|--------|----------|----------|------------|------------|------------|--------|--------|
| F28_1  | 47.74M   | 7.16G    | 47.22M     | 6.79G      | 94.80%     | 94.83% | 46.88% |
| F28_2  | 50.10M   | 7.52G    | 49.57M     | 7.15G      | 95.08%     | 94.86% | 47.45% |
| F28_3  | 47.03M   | 7.05G    | 46.54M     | 6.70G      | 95.00%     | 94.86% | 47.01% |
| F28C_1 | 49.52M   | 7.43G    | 48.99M     | 7.05G      | 94.93%     | 94.86% | 47.50% |
| F28C_2 | 47.81M   | 7.17G    | 47.31M     | 6.75G      | 94.14%     | 95.11% | 48.48% |
| F28C_3 | 46.92M   | 7.04G    | 46.28M     | 6.60G      | 93.75%     | 94.17% | 47.08% |
| F8_1   | 49.59M   | 7.44G    | 49.00M     | 7.05G      | 94.79%     | 94.30% | 46.95% |
| F8_2   | 49.42M   | 7.41G    | 48.77M     | 7.04G      | 94.95%     | 94.15% | 47.04% |
| F8_3   | 48.91M   | 7.34G    | 48.29M     | 6.91G      | 94.26%     | 94.37% | 46.61% |
| F8C_1  | 46.71M   | 7.01G    | 46.19M     | 6.65G      | 94.86%     | 94.77% | 46.97% |
| F8C_2  | 47.15M   | 7.07G    | 46.61M     | 6.71G      | 94.80%     | 94.76% | 46.95% |
| F8C_3  | 44.02M   | 6.60G    | 43.54M     | 6.28G      | 95.06%     | 94.80% | 46.77% |

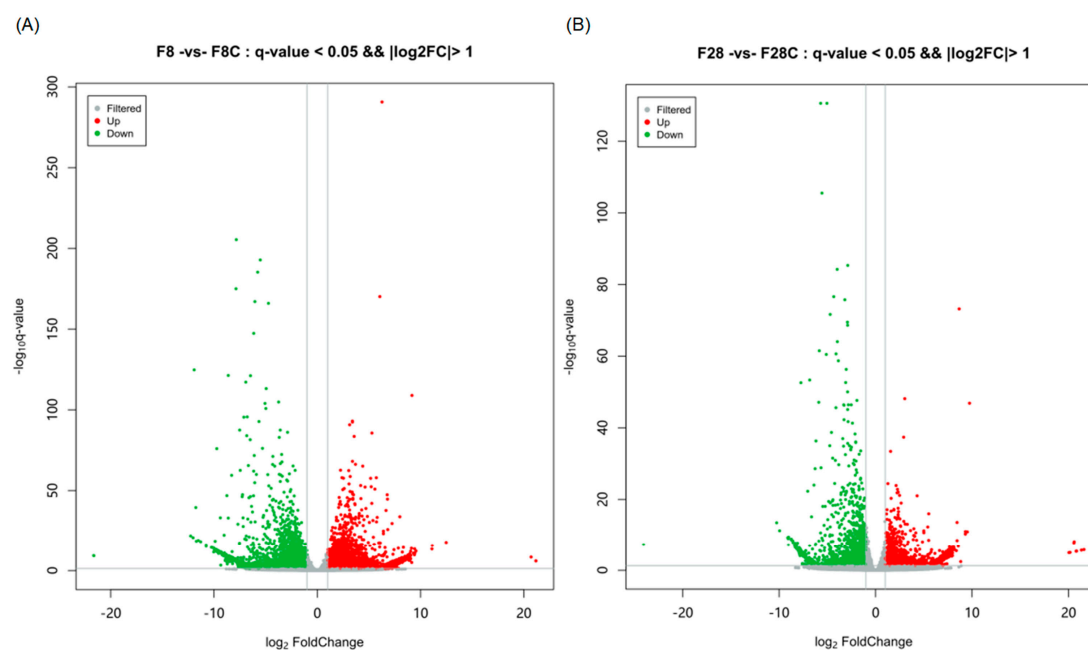

**Figure S1.** Volcano plots shows differentially expressed genes caused by starvation for eight (A) and 28 (B) days. F8C, un-starved yellowcheek samples collected on the eighth day after starvation experiment; F28C, un-starved yellowcheek samples collected on the 28th day after starvation experiment; F8, starved yellowcheek samples collected on the eighth day after starvation experiment; F28, starved yellowcheek samples collected on the 28th day after starvation experiment.

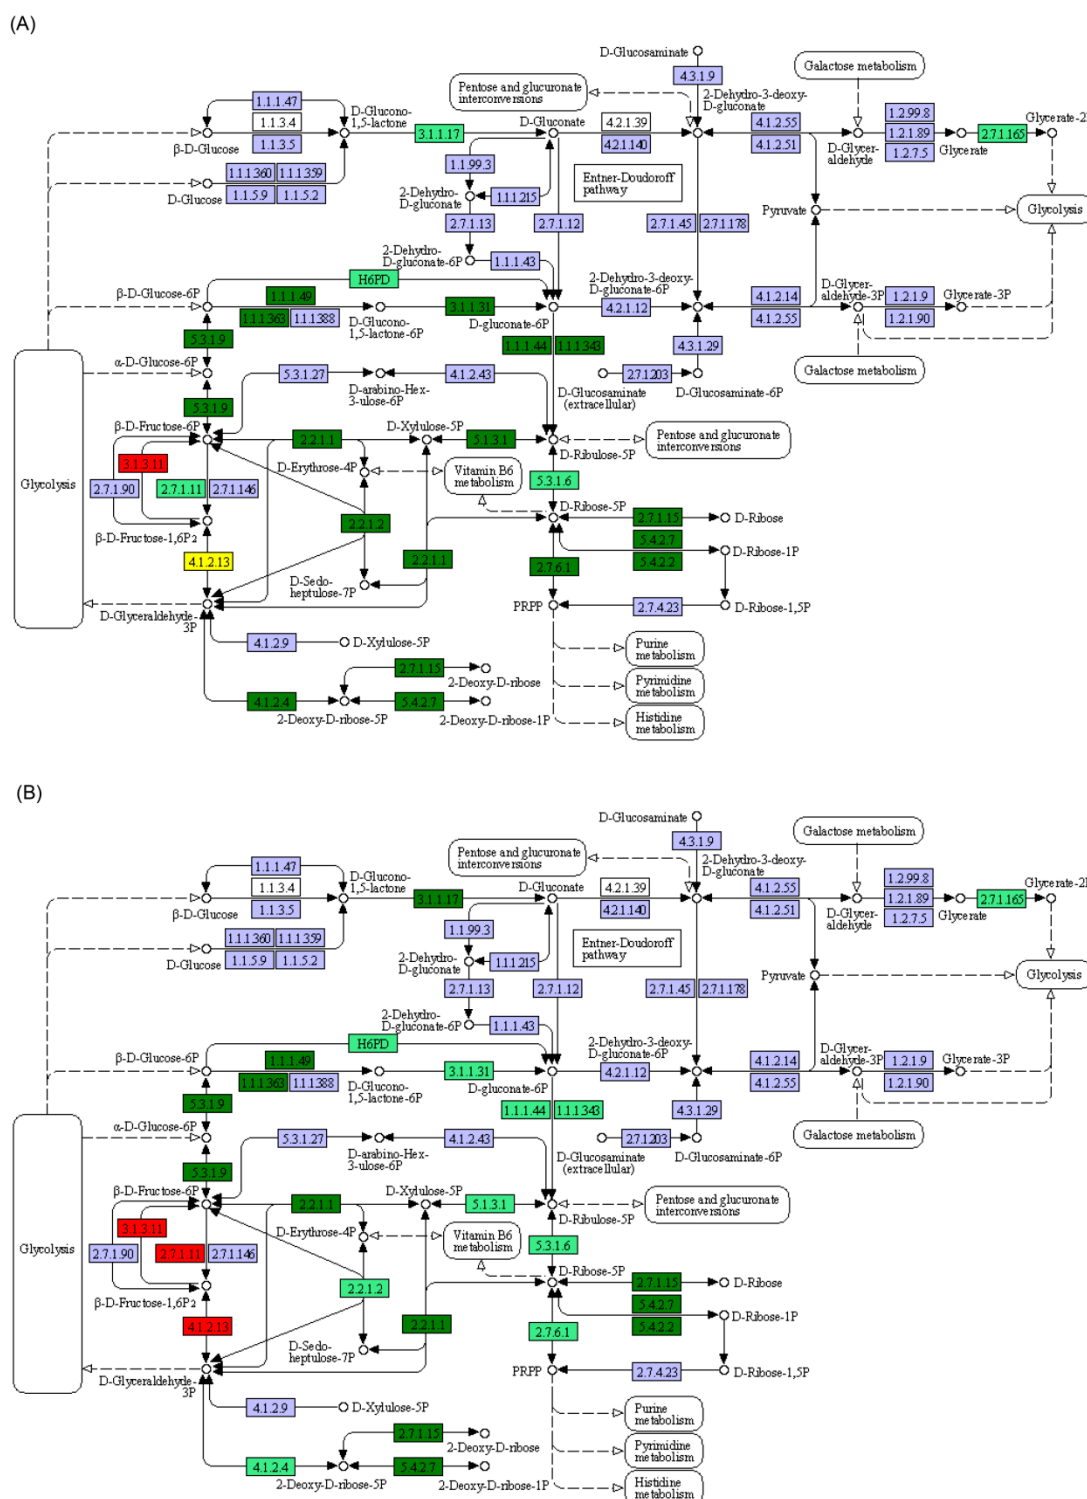

**Figure S2.** KEGG pathway showed significantly up- and down-regulated genes participate in pentose phosphate in the liver transcriptome of yellowcheek starved for eight (A) and 28 (B) days compared with the control. Red indicates significantly up-regulated genes, dark green indicates significantly down-regulated genes, yellow indicates both up- and down-regulated genes in the corresponding genes, light green indicates that the genes of the species annotated on the map, light purple indicates that the genes were not annotated on the map, and white indicates unknown genes.

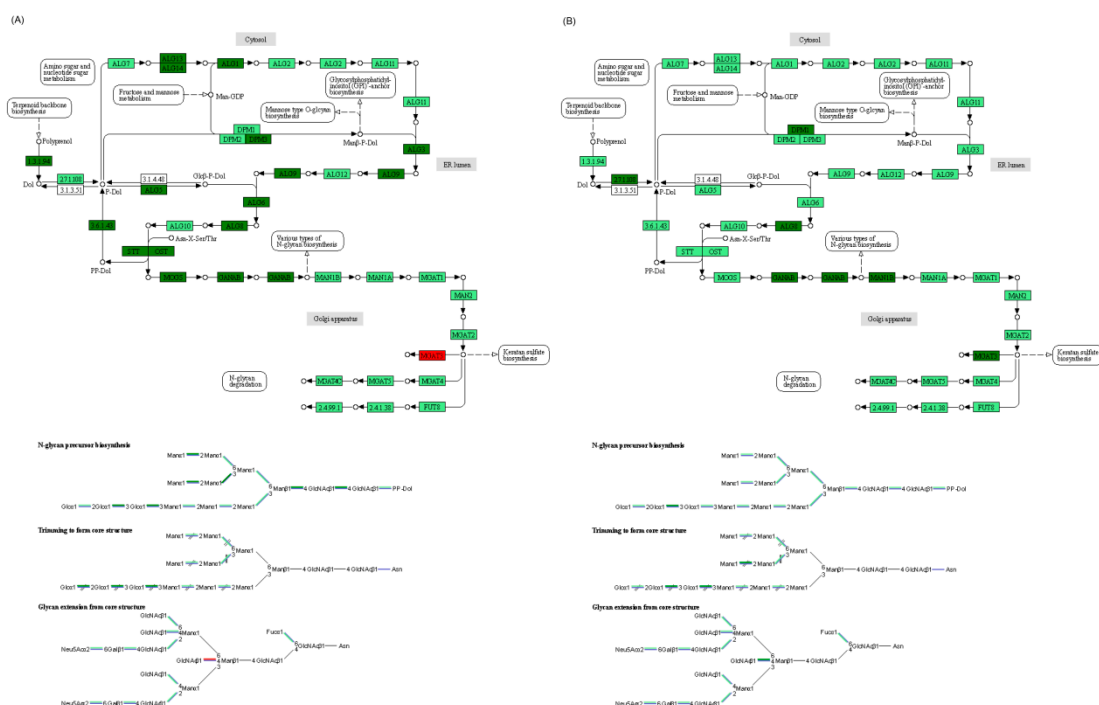

**Figure S3.** KEGG pathway showed significantly up- and down-regulated genes participate in N-glycan biosynthesis in the liver transcriptome of yellowcheek starved for eight (A) and 28 (B) days compared with the control. Red indicates significantly up-regulated genes, dark green indicates significantly down-regulated genes, light green indicates that the genes of the species annotated on the map, light purple indicates that the genes were not annotated on the map, and white indicates unknown genes.

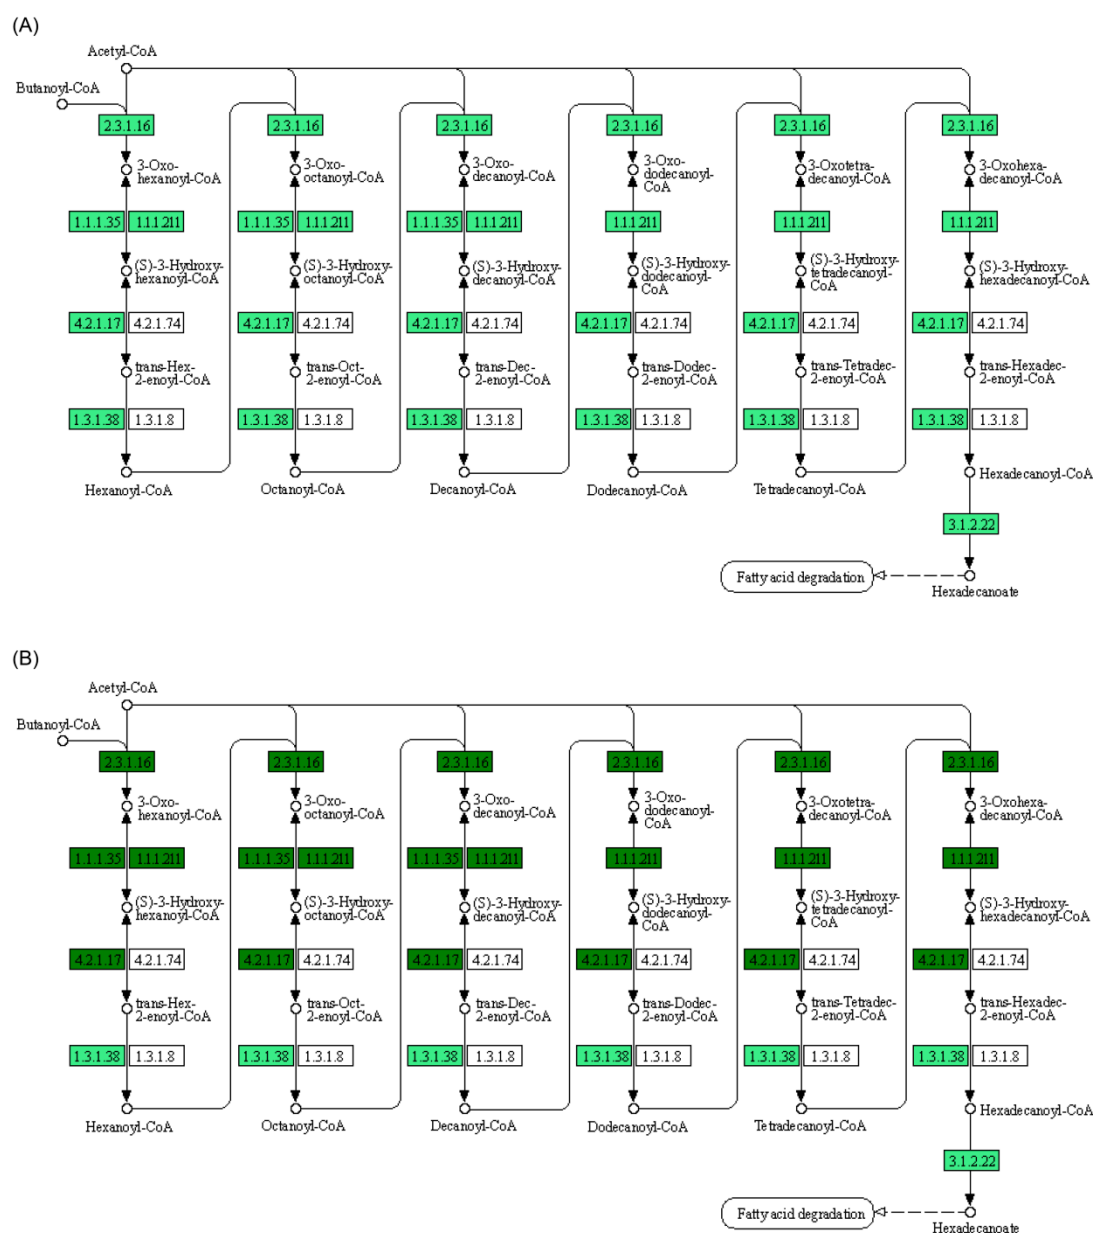

**Figure S4.** KEGG pathway showed significantly up- and down-regulated genes participate in fatty acid elongation in mitochondria ( $4 < n < 16$ ) in the liver transcriptome of yellowcheek starved for eight (A) and 28 (B) days compared with the control. Red indicates significantly up-regulated genes, dark green indicates significantly down-regulated genes, yellow indicates both up- and down-regulated genes in the corresponding genes, light green indicates that the genes of the species annotated on the map, light purple indicates that the genes were not annotated on the map, and white indicates unknown genes.

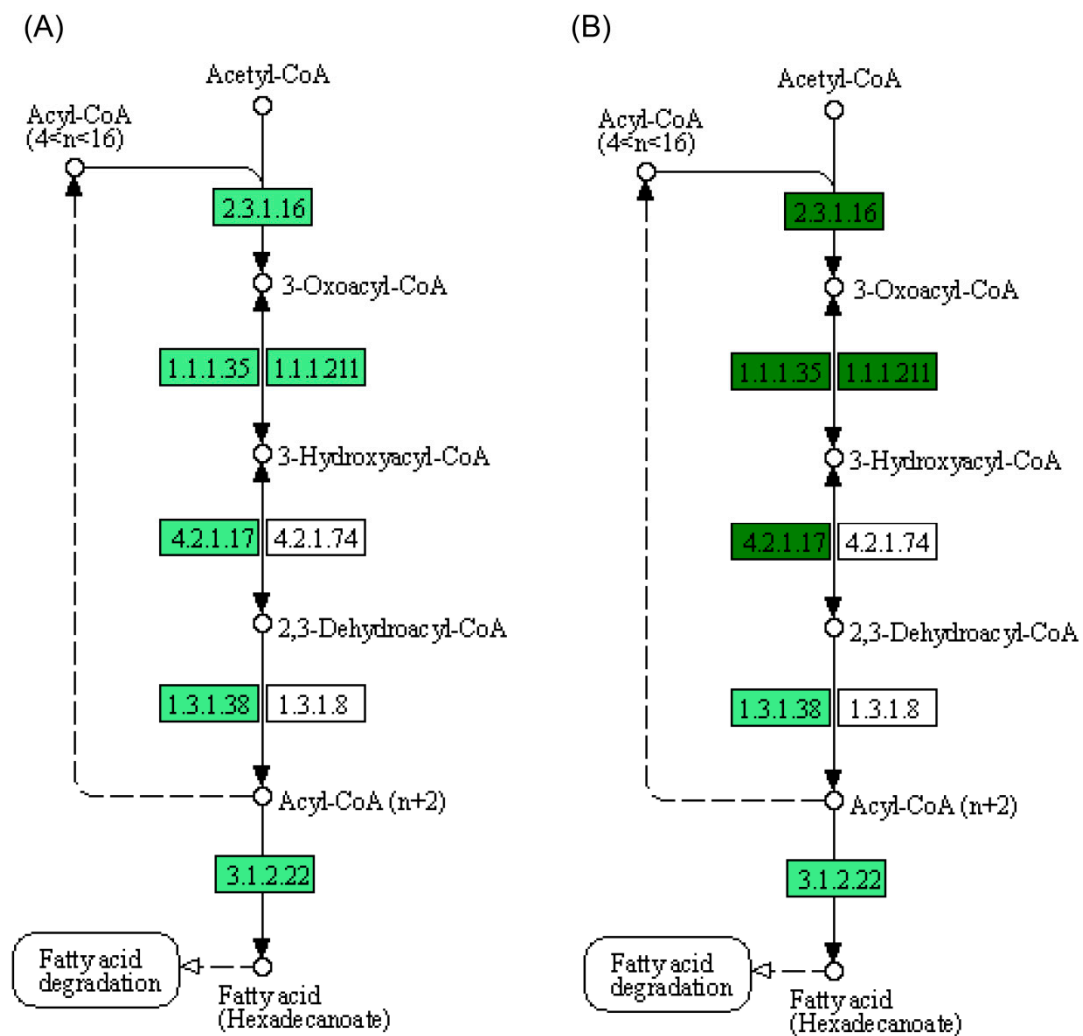

**Figure S5.** KEGG pathway showed significantly up- and down-regulated genes participate in general forms of fatty acid elongation in mitochondria ( $4 < n < 16$ ) in the liver transcriptome of yellowcheek starved for eight (A) and 28 (B) days compared with the control. Dark green indicates significantly down-regulated genes, light green indicates that the genes of the species annotated on the map, and white indicates unknown genes.

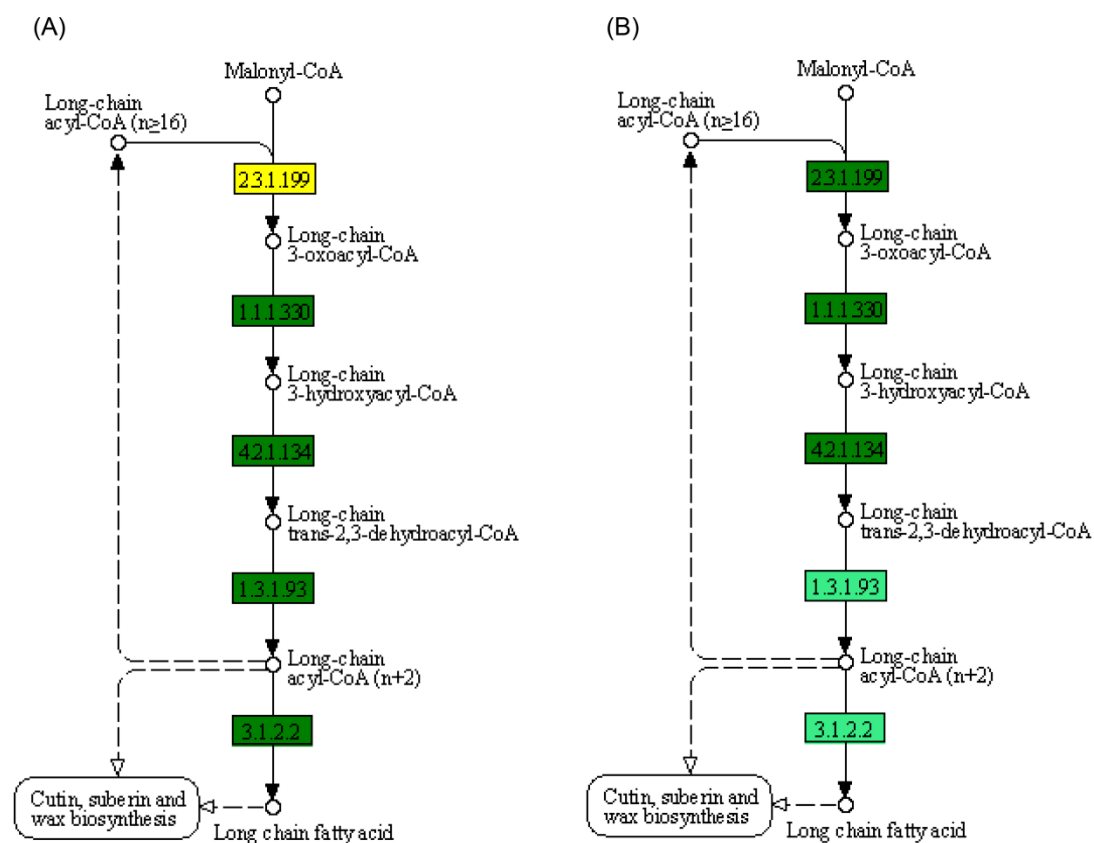

**Figure S6.** KEGG pathway showed significantly up- and down-regulated genes participate in fatty acid elongation in endoplasmic reticulum ( $n \geq 16$ ) in the liver transcriptome of yellowcheek starved for eight (A) and 28 (B) days compared with the control. Dark green indicates significantly down-regulated genes, yellow indicates both up- and down-regulated genes in the corresponding genes, and light green indicates that the genes of the species annotated on the map.

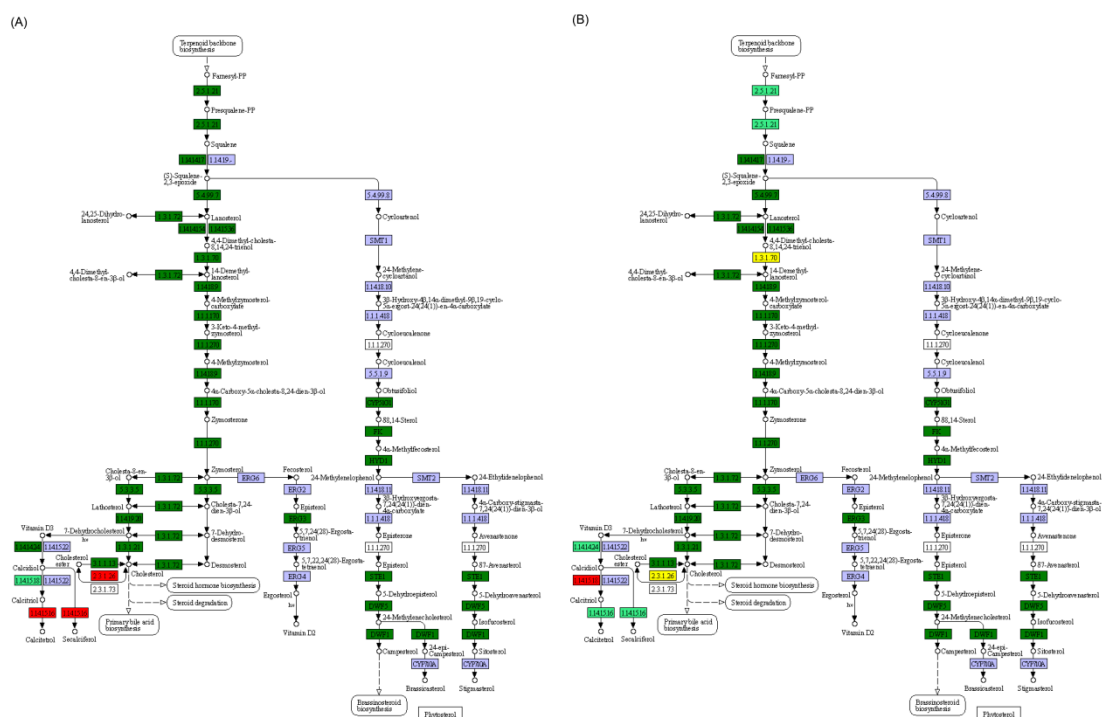

**Figure S7.** KEGG pathway showed significantly up- and down-regulated genes participate in steroid biosynthesis in the liver transcriptome of yellowcheek starved for eight (A) and 28 (B) days compared with the control. Red indicates significantly up-regulated genes, dark green indicates significantly down-regulated genes, yellow indicates both up- and down-regulated genes in the corresponding genes, light green indicates that the genes of the species annotated on the map, light purple indicates that the genes were not annotated on the map, and white indicates unknown genes.
